# Supplementary material for: Similar seed dispersal systems by local frugivorous birds in native and alien plant species in a coastal seawall forest
Source: PeerJ. 2021 Jun 22;9:e11672. doi: 10.7717/peerj.11672 (PMC8231312; doi:10.7717/peerj.11672)
Supplement: Supplemental Information 1 [file peerj-09-11672-s001.xlsx]

## Sheet: Sheet1
plant species	bird species	visiting number(ind.)	feeding time(s)	feeding amount(ind.)	first stop distance(m)	fruit color	Feeding pattern
Phytolacca americana	Light-vented Bulbul	3	31	4	6	Purple black	Swallow
Phytolacca americana	Light-vented Bulbul	1	6	3	10	Purple black	Swallow
Phytolacca americana	Light-vented Bulbul	2	15	3	10	Purple black	Swallow
Phytolacca americana	Light-vented Bulbul	2	5	1	5	Purple black	Swallow
Phytolacca americana	Light-vented Bulbul	2	12	2	15	Purple black	Swallow
Phytolacca americana	Light-vented Bulbul	1	6	3	5	Purple black	Swallow
Phytolacca americana	Light-vented Bulbul	1	10	2	2	Purple black	Swallow
Phytolacca americana	Light-vented Bulbul	3	12	4	20	Purple black	Swallow
Phytolacca americana	Light-vented Bulbul	2	13	3	20	Purple black	Swallow
Phytolacca americana	Light-vented Bulbul	2	15	5	5	Purple black	Swallow
Phytolacca americana	Light-vented Bulbul	1	6	6	12	Purple black	Swallow
Phytolacca americana	Light-vented Bulbul	1	11	6	20	Purple black	Swallow
Phytolacca americana	Light-vented Bulbul	2	6	8	5	Purple black	Swallow
Phytolacca americana	Light-vented Bulbul	1	5	3	10	Purple black	Swallow
Phytolacca americana	Light-vented Bulbul	3	7	4	12	Purple black	Swallow
Phytolacca americana	Light-vented Bulbul	2	5	2	6	Purple black	Swallow
Phytolacca americana	Light-vented Bulbul	1	4	3	5	Purple black	Swallow
Phytolacca americana	Light-vented Bulbul	2	15	4	15	Purple black	Swallow
Phytolacca americana	Light-vented Bulbul	1	25	7	10	Purple black	Swallow
Phytolacca americana	Light-vented Bulbul	1	30	3	15	Purple black	Swallow
Phytolacca americana	Light-vented Bulbul	2	18	5	6	Purple black	Swallow
Phytolacca americana	Light-vented Bulbul	3	31	9	5	Purple black	Swallow
Phytolacca americana	Light-vented Bulbul	1	15	3	5	Purple black	Swallow
Phytolacca americana	Light-vented Bulbul	2	7	6	12	Purple black	Swallow
Phytolacca americana	Light-vented Bulbul	3	15	5	5	Purple black	Swallow
Phytolacca americana	Light-vented Bulbul	1	12	6	15	Purple black	Swallow
Phytolacca americana	Light-vented Bulbul	2	13	2	20	Purple black	Swallow
Phytolacca americana	Light-vented Bulbul	1	25	4	5	Purple black	Swallow
Phytolacca americana	Light-vented Bulbul	1	8	4	5	Purple black	Swallow
Phytolacca americana	Light-vented Bulbul	3	5	3	30	Purple black	Swallow
Phytolacca americana	Light-vented Bulbul	3	11	3	15	Purple black	Swallow
Phytolacca americana	Light-vented Bulbul	2	15	6	5	Purple black	Swallow
Phytolacca americana	Light-vented Bulbul	2	17	2	10	Purple black	Swallow
Phytolacca americana	Light-vented Bulbul	2	6	6	6	Purple black	Swallow
Phytolacca americana	Light-vented Bulbul	3	8	2	5	Purple black	Swallow
Phytolacca americana	Light-vented Bulbul	3	7	3	20	Purple black	Swallow
Phytolacca americana	Light-vented Bulbul	3	8	3	14	Purple black	Swallow
Phytolacca americana	Light-vented Bulbul	2	15	4	6	Purple black	Swallow
Phytolacca americana	Light-vented Bulbul	3	12	4	5	Purple black	Swallow
Phytolacca americana	Light-vented Bulbul	2	10	6	5	Purple black	Swallow
Phytolacca americana	Light-vented Bulbul	1	6	4	10	Purple black	Swallow
Phytolacca americana	Light-vented Bulbul	3	23	2	15	Purple black	Swallow
Phytolacca americana	Light-vented Bulbul	1	12	3	10	Purple black	Swallow
Phytolacca americana	Light-vented Bulbul	5	20	4	15	Purple black	Swallow
Phytolacca americana	Light-vented Bulbul	3	25	3	15	Purple black	Swallow
Phytolacca americana	Light-vented Bulbul	1	14	6	20	Purple black	Swallow
Phytolacca americana	Light-vented Bulbul	2	6	3	10	Purple black	Swallow
Phytolacca americana	Light-vented Bulbul	3	12	8	30	Purple black	Swallow
Phytolacca americana	Light-vented Bulbul	4	15	7	20	Purple black	Swallow
Phytolacca americana	Light-vented Bulbul	1	20	5	15	Purple black	Swallow
Phytolacca americana	Light-vented Bulbul	3	30	8	20	Purple black	Swallow
Phytolacca americana	Light-vented Bulbul	1	25	4	15	Purple black	Swallow
Phytolacca americana	Light-vented Bulbul	3	30	2	20	Black	Swallow
Phytolacca americana	Light-vented Bulbul	2	15	4	20	Black	Swallow
Phytolacca americana	Light-vented Bulbul	1	15	2	20	Black	Swallow
Phytolacca americana	Light-vented Bulbul	2	23	5	10	Black	Swallow
Phytolacca americana	Light-vented Bulbul	2	20	4	6	Purple black	Swallow
Phytolacca americana	Light-vented Bulbul	3	15	4	30	Purple black	Swallow
Phytolacca americana	Light-vented Bulbul	4	10	2	20	Purple black	Swallow
Phytolacca americana	Light-vented Bulbul	2	8	1	15	Purple black	Swallow
Phytolacca americana	Light-vented Bulbul	2	5	2	50	Purple black	Swallow
Phytolacca americana	Light-vented Bulbul	2	25	2	35	Purple black	Swallow
Phytolacca americana	Light-vented Bulbul	3	6	6	20	Black	Swallow
Phytolacca americana	Light-vented Bulbul	2	25	5	10	Black	Swallow
Phytolacca americana	Light-vented Bulbul	3	20	7	10	Black	Swallow
Cayratia japonica	Light-vented Bulbul	1	6	2	6	Purple black	Swallow
Cayratia japonica	Light-vented Bulbul	1	4	1	5	Purple black	Swallow
Cayratia japonica	Light-vented Bulbul	4	20	1	20	Black	Swallow
Cayratia japonica	Light-vented Bulbul	2	10	2	6	Black	Swallow
Phytolacca americana	Common Blackbird	1	4	2	50	Purple black	Swallow
Phytolacca americana	Common Blackbird	1	5	2	25	Purple black	Swallow
Phytolacca americana	Common Blackbird	1	8	5	50	Purple black	Swallow
Phytolacca americana	Common Blackbird	1	12	7	30	Purple black	Swallow
Phytolacca americana	Common Blackbird	1	3	1	20	Purple black	Swallow
Phytolacca americana	Common Blackbird	1	2	1	30	Purple black	Swallow
Phytolacca americana	Common Blackbird	1	8	2	20	Purple black	Swallow
Phytolacca americana	Common Blackbird	1	7	5	30	Purple black	Swallow
Phytolacca americana	Common Blackbird	1	7	3	30	Purple black	Swallow
Phytolacca americana	Common Blackbird	1	12	4	25	Purple black	Swallow
Phytolacca americana	Common Blackbird	1	6	5	15	Purple black	Swallow
Phytolacca americana	Common Blackbird	1	8	3	20	Purple black	Swallow
Phytolacca americana	Common Blackbird	1	4	1	50	Purple black	Swallow
Phytolacca americana	Common Blackbird	1	10	5	10	Black	Swallow
Phytolacca americana	Common Blackbird	1	6	2	60	Black	Swallow
Phytolacca americana	Common Blackbird	1	9	6	20	Purple black	Swallow
Phytolacca americana	Common Blackbird	1	7	2	20	Purple black	Swallow
Phytolacca americana	Common Blackbird	1	14	10	10	Purple black	Swallow
Cayratia japonica	Common Blackbird	2	10	2	25	Black	Swallow
Cayratia japonica	Common Blackbird	1	3	1	20	Black	Swallow
Cayratia japonica	Common Blackbird	1	7	1	30	Black	Swallow
Phytolacca americana	Vinous-throated Parrotbill	5	4	3	5	Purple black	Pecking
Phytolacca americana	Vinous-throated Parrotbill	1	3	1	6	Purple black	Pecking
Phytolacca americana	Vinous-throated Parrotbill	4	3	2	5	Purple black	Pecking
Phytolacca americana	Vinous-throated Parrotbill	5	5	7	5	Purple black	Swallow
Phytolacca americana	Vinous-throated Parrotbill	3	7	5	3	Purple black	Pecking
Phytolacca americana	Vinous-throated Parrotbill	2	7	3	6	Purple black	Pecking
Phytolacca americana	Vinous-throated Parrotbill	3	4	2	10	Purple black	Pecking
Phytolacca americana	Vinous-throated Parrotbill	2	12	5	5	Purple black	Pecking
Phytolacca americana	Vinous-throated Parrotbill	2	4	4	6	Purple black	Pecking
Phytolacca americana	Vinous-throated Parrotbill	2	3	1	6	Purple black	Pecking
Phytolacca americana	Vinous-throated Parrotbill	3	5	2	10	Purple black	Pecking
Phytolacca americana	Vinous-throated Parrotbill	3	5	3	6	Purple black	Pecking
Phytolacca americana	Vinous-throated Parrotbill	2	10	6	6	Purple black	Pecking
Phytolacca americana	Vinous-throated Parrotbill	4	6	6	5	Black	Swallow
Phytolacca americana	Vinous-throated Parrotbill	2	4	2	10	Black	Swallow
Phytolacca americana	Vinous-throated Parrotbill	3	12	4	10	Purple black	Pecking
Phytolacca americana	Vinous-throated Parrotbill	3	5	5	10	Purple black	Swallow
Phytolacca americana	Blue-and-white Flycatcher	1	1	1	3	Purple black	Swallow
Phytolacca americana	Blue-and-white Flycatcher	1	1	1	3	Purple black	Swallow
Phytolacca americana	Blue-and-white Flycatcher	1	5	2	7	Purple black	Swallow
Phytolacca americana	Blue-and-white Flycatcher	1	3	2	5	Purple black	Swallow
Phytolacca americana	Blue-and-white Flycatcher	1	13	2	5	Purple black	Swallow
Phytolacca americana	Blue-and-white Flycatcher	1	6	2	10	Purple black	Swallow
Phytolacca americana	Blue-and-white Flycatcher	1	8	5	15	Black	Swallow
Phytolacca americana	Blue-and-white Flycatcher	1	4	1	9	Purple black	Swallow
Phytolacca americana	Blue-and-white Flycatcher	1	5	1	20	Purple black	Swallow
Phytolacca americana	Blue-and-white Flycatcher	1	8	2	5	Purple black	Swallow
Phytolacca americana	Blue-and-white Flycatcher	1	3	1	9	Purple black	Swallow
Phytolacca americana	White-cheeked Starling	1	5	3	40	Purple black	Swallow
Phytolacca americana	White-cheeked Starling	1	5	2	120	Purple black	Swallow
Phytolacca americana	White-cheeked Starling	2	10	4	70	Purple black	Swallow
Phytolacca americana	White-cheeked Starling	1	12	3	50	Purple black	Swallow
Phytolacca americana	White-cheeked Starling	2	7	6	60	Purple black	Swallow
Phytolacca americana	White-cheeked Starling	2	21	7	60	Purple black	Swallow
Phytolacca americana	White-cheeked Starling	2	10	6	50	Purple black	Swallow
Phytolacca americana	White-cheeked Starling	2	6	3	100	Purple black	Swallow
Phytolacca americana	White-cheeked Starling	1	15	8	80	Purple black	Swallow
Cayratia japonica	White-cheeked Starling	6	6	3	150	Purple black	Swallow
Cayratia japonica	White-cheeked Starling	5	30	2	30	Black	Swallow
Cayratia japonica	White-cheeked Starling	3	40	1	120	Black	Swallow
Cayratia japonica	White-cheeked Starling	2	12	1	50	Black	Swallow
Cayratia japonica	White-cheeked Starling	12	10	1	100	Black	Swallow
Cayratia japonica	White-cheeked Starling	2	7	2	10	Black	Swallow
Cayratia japonica	White-cheeked Starling	3	23	2	110	Black	Swallow
Cayratia japonica	White-cheeked Starling	2	35	3	100	Black	Swallow
Cayratia japonica	White-cheeked Starling	5	50	1	30	Black	Swallow
Cayratia japonica	White-cheeked Starling	5	25	2	100	Black	Swallow
Cayratia japonica	White-cheeked Starling	11	58	3	25	Black	Swallow
Phytolacca americana	Black-billed Magpie	1	3	1	20	Purple black	Swallow
Phytolacca americana	Black-billed Magpie	1	6	3	25	Purple black	Swallow
Phytolacca americana	Black-billed Magpie	1	8	3	30	Purple black	Swallow
Phytolacca americana	Black-billed Magpie	1	11	6	30	Purple black	Swallow
Phytolacca americana	Black-billed Magpie	1	12	10	15	Purple black	Swallow
Phytolacca americana	Black-billed Magpie	1	5	2	30	Purple black	Swallow
Phytolacca americana	Black-billed Magpie	2	7	2	30	Purple black	Swallow
Phytolacca americana	Black-billed Magpie	1	13	5	15	Purple black	Swallow
Phytolacca americana	Black-billed Magpie	1	25	6	15	Purple black	Swallow
Cayratia japonica	Black-billed Magpie	1	5	1	30	Black	Swallow
Cayratia japonica	Black-billed Magpie	2	11	3	30	Black	Swallow
Cayratia japonica	Black-billed Magpie	1	12	2	60	Black	Swallow
Cayratia japonica	Black-billed Magpie	1	6	1	25	Black	Swallow
Cayratia japonica	Black-billed Magpie	1	10	2	30	Black	Swallow
Cayratia japonica	Black-billed Magpie	1	11	1	15	Black	Swallow
Cayratia japonica	Black-billed Magpie	1	20	2	30	Black	Swallow
Cayratia japonica	Black-billed Magpie	2	20	1	20	Black	Swallow
Cayratia japonica	Black-billed Magpie	1	30	4	10	Black	Swallow
Cayratia japonica	Black-billed Magpie	3	5	2	50	Black	Swallow
Cayratia japonica	Black-billed Magpie	2	5	1	50	Black	Swallow
Cayratia japonica	Black-billed Magpie	2	30	2	20	Black	Swallow
Cayratia japonica	Black-billed Magpie	1	15	2	15	Black	Swallow
Cayratia japonica	Black-billed Magpie	1	20	2	20	Black	Swallow
Cayratia japonica	Black-billed Magpie	1	25	2	30	Black	Swallow
Cayratia japonica	Black-billed Magpie	2	5	1	30	Black	Swallow
Cayratia japonica	Black-billed Magpie	1	4	1	30	Black	Swallow
Cayratia japonica	Black-billed Magpie	1	7	2	8	Black	Swallow
Cayratia japonica	Black-billed Magpie	3	35	3	30	Purple black	Swallow
Cayratia japonica	Black-billed Magpie	2	20	1	50	Purple black	Swallow
Cayratia japonica	Black-billed Magpie	1	20	3	20	Purple black	Swallow
Cayratia japonica	Black-billed Magpie	1	25	2	30	Black	Swallow
Cayratia japonica	Black-billed Magpie	2	31	3	20	Black	Swallow
Cayratia japonica	Black-billed Magpie	1	12	5	15	Black	Swallow
Cayratia japonica	Black-billed Magpie	2	30	1	15	Purple black	Swallow
Cayratia japonica	Black-billed Magpie	2	30	1	50	Black	Swallow
Cayratia japonica	Black-billed Magpie	3	15	3	60	Black	Swallow
Cayratia japonica	Black-billed Magpie	2	3	1	30	Black	Swallow
Cayratia japonica	Black-billed Magpie	1	5	1	15	Black	Swallow
Cayratia japonica	Black-billed Magpie	1	4	2	20	Black	Swallow
Cayratia japonica	Black-billed Magpie	1	7	2	20	Black	Swallow
Cayratia japonica	Black-billed Magpie	2	30	2	40	Black	Swallow
Cayratia japonica	Black-billed Magpie	1	20	5	30	Black	Swallow
Cayratia japonica	Black-billed Magpie	1	15	5	20	Black	Swallow
Cayratia japonica	Black-billed Magpie	1	40	2	80	Black	Swallow
Phytolacca americana	Great Tit	2	6	2	10	Purple black	Swallow
Phytolacca americana	Great Tit	1	3	1	10	Purple black	Swallow
Phytolacca americana	Great Tit	1	10	2	15	Purple black	Pecking
Phytolacca americana	Great Tit	1	5	3	12	Purple black	Swallow
Phytolacca americana	Great Tit	1	5	2	20	Purple black	Pecking
Phytolacca americana	Great Tit	1	5	2	20	Purple black	Pecking
Phytolacca americana	Great Tit	1	15	3	10	Purple black	Swallow
Phytolacca americana	Great Tit	1	6	3	15	Purple black	Swallow
Phytolacca americana	Great Tit	1	6	2	11	Purple black	Swallow
Phytolacca americana	Great Tit	1	5	1	5	Purple black	Pecking
Phytolacca americana	Great Tit	1	12	3	10	Black	Swallow
Phytolacca americana	Great Tit	2	6	4	10	Purple black	Swallow
Phytolacca americana	Great Tit	1	5	2	10	Purple black	Swallow
Cayratia japonica	Great Tit	1	5	1	12	Black	Swallow
Cayratia japonica	Black-napped Oriole	1	5	2	15	Purple black	Swallow
Cayratia japonica	Black-napped Oriole	1	4	1	60	Black	Swallow
Cayratia japonica	Black-napped Oriole	2	20	3	60	Black	Swallow
Cayratia japonica	Black-napped Oriole	1	5	2	20	Purple black	Swallow
Cayratia japonica	Black-napped Oriole	1	4	1	30	Green	Swallow
Cayratia japonica	Black-napped Oriole	1	15	6	30	Black	Swallow
Cayratia japonica	Black-napped Oriole	1	22	3	20	Black	Swallow
Cayratia japonica	Black-napped Oriole	2	20	3	20	Black	Swallow
Cayratia japonica	Black-napped Oriole	5	50	22	150	Black	Swallow
Cayratia japonica	Black-napped Oriole	4	15	12	50	Black	Swallow
Cayratia japonica	Black-napped Oriole	3	50	12	50	Black	Swallow
Cayratia japonica	Black-napped Oriole	3	50	12	15	Black	Swallow
Phytolacca americana	Black-tailed Hawfinch	1	13	8	20	Purple black	Pecking
Phytolacca americana	Black-tailed Hawfinch	1	5	1	10	Purple black	Pecking
Phytolacca americana	Black-tailed Hawfinch	1	7	6	10	Purple black	Pecking
Phytolacca americana	Black-tailed Hawfinch	1	15	3	20	Black	Swallow
Cayratia japonica	Black-tailed Hawfinch	5	15	1	30	Purple black	Pecking
Cayratia japonica	Black-tailed Hawfinch	3	25	2	30	Purple black	Pecking
Cayratia japonica	Black-tailed Hawfinch	2	15	3	50	Black	Swallow
Cayratia japonica	Black-tailed Hawfinch	1	6	1	20	Black	Swallow
Cayratia japonica	Black-tailed Hawfinch	2	15	1	15	Purple black	Pecking
Cayratia japonica	Black-tailed Hawfinch	3	30	2	35	Purple black	Pecking
Cayratia japonica	Black-tailed Hawfinch	2	6	1	15	Black	Pecking
Cayratia japonica	Black-tailed Hawfinch	1	3	1	20	Black	Pecking
Cayratia japonica	Black-tailed Hawfinch	3	45	3	50	Black	Pecking
Cayratia japonica	Black-tailed Hawfinch	1	20	1	18	Black	Pecking
Cayratia japonica	Black-tailed Hawfinch	1	45	2	20	Black	Pecking
Cayratia japonica	Black-tailed Hawfinch	2	30	3	20	Black	Pecking
Cayratia japonica	Black-tailed Hawfinch	1	15	1	15	Black	Pecking
Phytolacca americana	Grey-backed Thrush	1	3	1	7	Purple black	Swallow
Phytolacca americana	Grey-backed Thrush	1	5	2	25	Purple black	Swallow
Phytolacca americana	Grey-backed Thrush	1	7	2	15	Purple black	Swallow
Phytolacca americana	Grey-backed Thrush	1	16	6	30	Purple black	Swallow
Cayratia japonica	Grey-backed Thrush	2	20	2	50	Black	Swallow
Cayratia japonica	Grey-backed Thrush	1	8	1	30	Black	Swallow
Cayratia japonica	Grey-backed Thrush	1	7	1	15	Black	Swallow
Cayratia japonica	Grey-backed Thrush	1	12	3	50	Black	Swallow
Cayratia japonica	Grey-backed Thrush	2	20	2	50	Black	Swallow
Cayratia japonica	Grey-backed Thrush	2	20	2	60	Black	Swallow
Phytolacca americana	Black-faced Bunting	2	12	3	7	Purple black	Pecking
Phytolacca americana	Black-faced Bunting	1	6	1	4	Purple black	Pecking
Phytolacca americana	Black-faced Bunting	3	12	1	7	Purple black	Pecking
Phytolacca americana	Black-faced Bunting	1	13	2	5	Purple black	Pecking
Phytolacca americana	Black-faced Bunting	1	18	1	5	Purple black	Pecking
Phytolacca americana	Black-faced Bunting	1	8	2	5	Purple black	Pecking
Phytolacca americana	Black-faced Bunting	1	11	2	5	Purple black	Pecking
Phytolacca americana	Black-faced Bunting	1	12	4	14	Purple black	Pecking
Phytolacca americana	Black-faced Bunting	3	12	3	5	Purple black	Swallow
Phytolacca americana	Black-faced Bunting	1	5	2	5	Purple black	Swallow
Phytolacca americana	Black-faced Bunting	2	12	2	6	Purple black	Pecking
Phytolacca americana	Black-faced Bunting	1	15	2	5	Purple black	Pecking
Phytolacca americana	Black-faced Bunting	3	15	1	20	Purple black	Swallow
