# Supplementary material for: Similar seed dispersal systems by local frugivorous birds in native and alien plant species in a coastal seawall forest
Source: PeerJ. 2021 Jun 22;9:e11672. doi: 10.7717/peerj.11672 (PMC8231312; doi:10.7717/peerj.11672)
Supplement: Supplemental Information 2 [file peerj-09-11672-s002.xlsx]

## Sheet: Fruit Size
order	Phytolacca americana(mm)	Cayratia japonica(mm)
1	6.71	9.52
2	6.72	10.38
3	8.57	8.51
4	8.31	8.53
5	8.3	10.68
6	7.41	9.81
7	7.95	10.64
8	8.19	11.05
9	8.9	11.07
10	7.67	9.64
11	7.77	10.64
12	8.33	10.32
13	8.21	10.04
14	6.52	9.4
15	7.97	9.27
16	7.85	8.93
17	7.84	11.59
18	7.76	9.95
19	8.94	8.71
20	8.13	11.07
	0.64546	0.892434	SD
	7.9025	9.9875	Mean

## Sheet: Fruit Height
order	Cayratia japonica(m)	Phytolacca americana (m）
1	0.22	0.9
2	0.15	0.98
3	0.3	1.2
4	0.24	1.6
5	0.3	1.8
6	0.25	1.5
7	0.1	1.2
8	0.25	1.1
9	0.14	1.3
10	0.14	1.5
11	0.34	1.6
12	0.21	1.2
13	0.14	1.7
14	0.17	1.2
15	0.27	1.1
16	0.31	1.3
17	0.17	0.9
18	0.24	1.2
19	0.19	1.6
20	0.37	1.1
	0.0731095	0.260037	SD
	0.225	1.299	Mean
