# Supplementary material for: Similar seed dispersal systems by local frugivorous birds in native and alien plant species in a coastal seawall forest
Source: PeerJ. 2021 Jun 22;9:e11672. doi: 10.7717/peerj.11672 (PMC8231312; doi:10.7717/peerj.11672)
Supplement: Supplemental Information 3 [file peerj-09-11672-s003.xlsx]

## Sheet: Phytolacca americana
bowl number	plant species	seed controls	planting number	planting time	Location	seedling number (June-5)	seedling number (June-20)	seedling number (July-5)	seedling number (July-20)	seedling number (August-5)	seedling number (August-15)	sum
1	Phytolacca americana	intact fruits	5	2018-11-02	laboratory balcony	0	0	0	1	0	0	1
2	Phytolacca americana	intact fruits	5	2018-11-02	laboratory balcony	0	0	0	0	0	1	1
3	Phytolacca americana	intact fruits	5	2018-11-02	laboratory balcony	1	0	0	0	0	0	1
4	Phytolacca americana	intact fruits	5	2018-11-02	laboratory balcony	0	0	0	0	0	0	0
5	Phytolacca americana	intact fruits	5	2018-11-02	laboratory balcony	0	0	0	0	0	0	0
6	Phytolacca americana	intact fruits	5	2018-11-02	laboratory balcony	0	0	0	0	1	0	1
7	Phytolacca americana	intact fruits	5	2018-11-02	laboratory balcony	0	0	0	1	0	0	1
8	Phytolacca americana	intact fruits	5	2018-11-02	laboratory balcony	1	0	0	0	0	0	1
9	Phytolacca americana	intact fruits	5	2018-11-02	laboratory balcony	0	1	0	0	0	0	1
10	Phytolacca americana	intact fruits	5	2018-11-02	laboratory balcony	0	0	0	0	0	0	0
11	Phytolacca americana	intact fruits	5	2018-11-02	laboratory balcony	0	0	0	0	0	0	0
12	Phytolacca americana	intact fruits	5	2018-11-02	laboratory balcony	0	0	0	1	0	1	2
13	Phytolacca americana	intact fruits	5	2018-11-02	laboratory balcony	0	0	0	0	0	0	0
14	Phytolacca americana	intact fruits	5	2018-11-02	laboratory balcony	0	0	0	1	0	0	1
15	Phytolacca americana	intact fruits	5	2018-11-02	laboratory balcony	0	0	0	0	0	0	0
16	Phytolacca americana	intact fruits	5	2018-11-02	laboratory balcony	0	0	0	0	0	1	1
17	Phytolacca americana	intact fruits	5	2018-11-02	laboratory balcony	0	0	0	0	0	0	0
18	Phytolacca americana	intact fruits	5	2018-11-02	laboratory balcony	0	0	0	0	1	0	1
19	Phytolacca americana	intact fruits	5	2018-11-02	laboratory balcony	0	0	0	0	0	0	0
20	Phytolacca americana	intact fruits	5	2018-11-02	laboratory balcony	0	0	0	1	0	0	1
21	Phytolacca americana	hand-cleaned seeds	5	2018-11-02	laboratory balcony	0	1	0	1	2	0	4
22	Phytolacca americana	hand-cleaned seeds	5	2018-11-02	laboratory balcony	1	1	0	2	0	1	5
23	Phytolacca americana	hand-cleaned seeds	5	2018-11-02	laboratory balcony	0	1	2	0	0	0	3
24	Phytolacca americana	hand-cleaned seeds	5	2018-11-02	laboratory balcony	0	1	0	1	2	0	4
25	Phytolacca americana	hand-cleaned seeds	5	2018-11-02	laboratory balcony	0	0	2	0	0	0	2
26	Phytolacca americana	hand-cleaned seeds	5	2018-11-02	laboratory balcony	0	0	0	0	0	0	0
27	Phytolacca americana	hand-cleaned seeds	5	2018-11-02	laboratory balcony	0	0	0	1	1	1	3
28	Phytolacca americana	hand-cleaned seeds	5	2018-11-02	laboratory balcony	0	0	0	2	0	0	2
29	Phytolacca americana	hand-cleaned seeds	5	2018-11-02	laboratory balcony	1	0	0	0	0	0	1
30	Phytolacca americana	hand-cleaned seeds	5	2018-11-02	laboratory balcony	0	1	1	1	2	0	5
31	Phytolacca americana	hand-cleaned seeds	5	2018-11-02	laboratory balcony	0	0	1	0	2	0	3
32	Phytolacca americana	hand-cleaned seeds	5	2018-11-02	laboratory balcony	0	1	0	1	1	0	3
33	Phytolacca americana	hand-cleaned seeds	5	2018-11-02	laboratory balcony	1	1	1	0	0	2	5
34	Phytolacca americana	hand-cleaned seeds	5	2018-11-02	laboratory balcony	0	1	1	0	0	0	2
35	Phytolacca americana	hand-cleaned seeds	5	2018-11-02	laboratory balcony	0	2	0	0	0	0	2
36	Phytolacca americana	hand-cleaned seeds	5	2018-11-02	laboratory balcony	0	1	1	1	0	0	3
37	Phytolacca americana	hand-cleaned seeds	5	2018-11-02	laboratory balcony	0	1	1	0	0	0	2
38	Phytolacca americana	hand-cleaned seeds	5	2018-11-02	laboratory balcony	3	0	0	0	1	0	4
39	Phytolacca americana	hand-cleaned seeds	5	2018-11-02	laboratory balcony	0	1	1	0	1	0	3
40	Phytolacca americana	hand-cleaned seeds	5	2018-11-02	laboratory balcony	0	2	1	1	0	0	4
41	Phytolacca americana	defected seeds	5	2018-11-02	laboratory balcony	2	2	0	1	0	0	5
42	Phytolacca americana	defected seeds	5	2018-11-02	laboratory balcony	1	1	2	0	0	0	4
43	Phytolacca americana	defected seeds	5	2018-11-02	laboratory balcony	1	0	2	0	1	0	4
44	Phytolacca americana	defected seeds	5	2018-11-02	laboratory balcony	1	0	0	3	0	0	4
45	Phytolacca americana	defected seeds	5	2018-11-02	laboratory balcony	1	0	3	1	0	0	5
46	Phytolacca americana	defected seeds	5	2018-11-02	laboratory balcony	0	2	1	2	0	0	5
47	Phytolacca americana	defected seeds	5	2018-11-02	laboratory balcony	0	3	0	0	0	0	3
48	Phytolacca americana	defected seeds	5	2018-11-02	laboratory balcony	0	0	5	0	0	0	5
49	Phytolacca americana	defected seeds	5	2018-11-02	laboratory balcony	2	1	0	0	0	0	3
50	Phytolacca americana	defected seeds	5	2018-11-02	laboratory balcony	0	1	0	1	0	0	2
51	Phytolacca americana	defected seeds	5	2018-11-02	laboratory balcony	0	1	0	3	0	1	5
52	Phytolacca americana	defected seeds	5	2018-11-02	laboratory balcony	1	0	2	2	0	0	5
53	Phytolacca americana	defected seeds	5	2018-11-02	laboratory balcony	4	1	0	0	0	0	5
54	Phytolacca americana	defected seeds	5	2018-11-02	laboratory balcony	1	3	0	0	0	0	4
55	Phytolacca americana	defected seeds	5	2018-11-02	laboratory balcony	0	2	0	2	0	0	4
56	Phytolacca americana	defected seeds	5	2018-11-02	laboratory balcony	0	2	0	1	0	0	3
57	Phytolacca americana	defected seeds	5	2018-11-02	laboratory balcony	0	2	3	0	0	0	5
58	Phytolacca americana	defected seeds	5	2018-11-02	laboratory balcony	0	1	0	3	0	0	4
59	Phytolacca americana	defected seeds	5	2018-11-02	laboratory balcony	2	0	1	1	0	0	4
60	Phytolacca americana	defected seeds	5	2018-11-02	laboratory balcony	0	0	0	0	0	0	0

## Sheet: Cayratia japonica
bowl number	plant species	seed controls	planting number	planting time	Location	seedling number (June-5)	seedling number (June-20)	seedling number (July-5)	seedling number (July-20)	seedling number (August-5)	seedling number (August-18)	sum
1	Cayratia japonica	intact fruits	5	2018-11-02	laboratory balcony	1	0	0	0	1	0	2
2	Cayratia japonica	intact fruits	5	2018-11-02	laboratory balcony	0	0	0	0	0	0	0
3	Cayratia japonica	intact fruits	5	2018-11-02	laboratory balcony	0	0	1	0	0	0	1
4	Cayratia japonica	intact fruits	5	2018-11-02	laboratory balcony	0	0	3	0	0	0	3
5	Cayratia japonica	intact fruits	5	2018-11-02	laboratory balcony	0	0	0	0	0	0	0
6	Cayratia japonica	intact fruits	5	2018-11-02	laboratory balcony	0	0	0	0	0	0	0
7	Cayratia japonica	intact fruits	5	2018-11-02	laboratory balcony	0	0	0	0	0	0	0
8	Cayratia japonica	intact fruits	5	2018-11-02	laboratory balcony	3	0	0	0	0	0	3
9	Cayratia japonica	intact fruits	5	2018-11-02	laboratory balcony	0	0	0	0	0	0	0
10	Cayratia japonica	intact fruits	5	2018-11-02	laboratory balcony	0	0	0	0	0	0	0
11	Cayratia japonica	intact fruits	5	2018-11-02	laboratory balcony	0	1	1	0	0	0	2
12	Cayratia japonica	intact fruits	5	2018-11-02	laboratory balcony	0	0	0	2	0	0	2
13	Cayratia japonica	intact fruits	5	2018-11-02	laboratory balcony	0	0	0	0	0	0	0
14	Cayratia japonica	intact fruits	5	2018-11-02	laboratory balcony	0	0	0	0	1	0	1
15	Cayratia japonica	intact fruits	5	2018-11-02	laboratory balcony	1	0	0	0	0	0	1
16	Cayratia japonica	intact fruits	5	2018-11-02	laboratory balcony	1	0	0	0	0	0	1
17	Cayratia japonica	intact fruits	5	2018-11-02	laboratory balcony	0	0	0	0	0	0	0
18	Cayratia japonica	intact fruits	5	2018-11-02	laboratory balcony	0	1	0	0	0	0	1
19	Cayratia japonica	intact fruits	5	2018-11-02	laboratory balcony	1	0	0	0	0	0	1
20	Cayratia japonica	intact fruits	5	2018-11-02	laboratory balcony	0	0	0	0	0	0	0
21	Cayratia japonica	hand-cleaned seeds	5	2018-11-02	laboratory balcony	2	1	0	2	0	0	5
22	Cayratia japonica	hand-cleaned seeds	5	2018-11-02	laboratory balcony	0	0	0	0	0	0	0
23	Cayratia japonica	hand-cleaned seeds	5	2018-11-02	laboratory balcony	0	0	0	4	0	0	4
24	Cayratia japonica	hand-cleaned seeds	5	2018-11-02	laboratory balcony	0	0	0	0	0	3	3
25	Cayratia japonica	hand-cleaned seeds	5	2018-11-02	laboratory balcony	0	2	2	0	0	0	4
26	Cayratia japonica	hand-cleaned seeds	5	2018-11-02	laboratory balcony	1	0	2	1	0	0	4
27	Cayratia japonica	hand-cleaned seeds	5	2018-11-02	laboratory balcony	1	0	1	3	0	0	5
28	Cayratia japonica	hand-cleaned seeds	5	2018-11-02	laboratory balcony	1	3	0	0	0	0	4
29	Cayratia japonica	hand-cleaned seeds	5	2018-11-02	laboratory balcony	0	1	2	0	0	0	3
30	Cayratia japonica	hand-cleaned seeds	5	2018-11-02	laboratory balcony	0	0	0	0	0	0	0
31	Cayratia japonica	hand-cleaned seeds	5	2018-11-02	laboratory balcony	0	0	0	1	3	0	4
32	Cayratia japonica	hand-cleaned seeds	5	2018-11-02	laboratory balcony	1	0	0	0	2	0	3
33	Cayratia japonica	hand-cleaned seeds	5	2018-11-02	laboratory balcony	2	0	2	0	0	0	4
34	Cayratia japonica	hand-cleaned seeds	5	2018-11-02	laboratory balcony	3	1	0	0	0	0	4
35	Cayratia japonica	hand-cleaned seeds	5	2018-11-02	laboratory balcony	0	0	5	0	0	0	5
36	Cayratia japonica	hand-cleaned seeds	5	2018-11-02	laboratory balcony	0	0	0	0	4	0	4
37	Cayratia japonica	hand-cleaned seeds	5	2018-11-02	laboratory balcony	1	0	2	0	0	0	3
38	Cayratia japonica	hand-cleaned seeds	5	2018-11-02	laboratory balcony	0	0	3	0	2	0	5
39	Cayratia japonica	hand-cleaned seeds	5	2018-11-02	laboratory balcony	0	0	0	0	0	4	4
40	Cayratia japonica	hand-cleaned seeds	5	2018-11-02	laboratory balcony	0	0	0	0	1	2	3
41	Cayratia japonica	defected seeds	5	2018-11-02	laboratory balcony	0	0	3	2	0	0	5
42	Cayratia japonica	defected seeds	5	2018-11-02	laboratory balcony	2	0	1	0	0	0	3
43	Cayratia japonica	defected seeds	5	2018-11-02	laboratory balcony	3	0	1	0	1	0	5
44	Cayratia japonica	defected seeds	5	2018-11-02	laboratory balcony	1	1	0	0	3	0	5
45	Cayratia japonica	defected seeds	5	2018-11-02	laboratory balcony	0	0	2	0	2	0	4
46	Cayratia japonica	defected seeds	5	2018-11-02	laboratory balcony	0	0	2	2	0	0	4
47	Cayratia japonica	defected seeds	5	2018-11-02	laboratory balcony	0	0	2	0	1	1	4
48	Cayratia japonica	defected seeds	5	2018-11-02	laboratory balcony	0	0	1	0	2	0	3
49	Cayratia japonica	defected seeds	5	2018-11-02	laboratory balcony	0	0	0	2	2	0	4
50	Cayratia japonica	defected seeds	5	2018-11-02	laboratory balcony	2	0	3	0	0	0	5
51	Cayratia japonica	defected seeds	5	2018-11-02	laboratory balcony	1	2	1	0	0	0	4
52	Cayratia japonica	defected seeds	5	2018-11-02	laboratory balcony	1	0	0	4	0	0	5
53	Cayratia japonica	defected seeds	5	2018-11-02	laboratory balcony	0	0	2	2	1	0	5
54	Cayratia japonica	defected seeds	5	2018-11-02	laboratory balcony	0	0	0	5	0	0	5
55	Cayratia japonica	defected seeds	5	2018-11-02	laboratory balcony	0	0	0	0	4	0	4
56	Cayratia japonica	defected seeds	5	2018-11-02	laboratory balcony	0	0	2	0	2	1	5
57	Cayratia japonica	defected seeds	5	2018-11-02	laboratory balcony	0	2	0	0	0	3	5
58	Cayratia japonica	defected seeds	5	2018-11-02	laboratory balcony	0	0	1	2	2	0	5
59	Cayratia japonica	defected seeds	5	2018-11-02	laboratory balcony	0	0	1	0	2	2	5
60	Cayratia japonica	defected seeds	5	2018-11-02	laboratory balcony	1	1	0	0	0	0	2
