# Supplementary material for: Similar seed dispersal systems by local frugivorous birds in native and alien plant species in a coastal seawall forest
Source: PeerJ. 2021 Jun 22;9:e11672. doi: 10.7717/peerj.11672 (PMC8231312; doi:10.7717/peerj.11672)
Supplement: Supplemental Information 4 [file peerj-09-11672-s004.xlsx]

## Sheet: seedling microhabitat selecting
Quadrat order	species	Microhabitats	Seedling number		Quadrat order	species	Microhabitats	Seedling number
1	Cayratia japonica	forest gap	15		1	Phytolacca americana	forest gap	19
1	Cayratia japonica	understory	11		1	Phytolacca americana	understory	3
2	Cayratia japonica	forest gap	8		2	Phytolacca americana	forest gap	10
2	Cayratia japonica	understory	11		2	Phytolacca americana	understory	2
3	Cayratia japonica	forest gap	21		3	Phytolacca americana	forest gap	28
3	Cayratia japonica	understory	6		3	Phytolacca americana	understory	2
4	Cayratia japonica	forest gap	8		4	Phytolacca americana	forest gap	17
4	Cayratia japonica	understory	28		4	Phytolacca americana	understory	3
5	Cayratia japonica	forest gap	15		5	Phytolacca americana	forest gap	4
5	Cayratia japonica	understory	14		5	Phytolacca americana	understory	6
6	Cayratia japonica	forest gap	10		6	Phytolacca americana	forest gap	6
6	Cayratia japonica	understory	17		6	Phytolacca americana	understory	2
7	Cayratia japonica	forest gap	30		7	Phytolacca americana	forest gap	24
7	Cayratia japonica	understory	5		7	Phytolacca americana	understory	0
8	Cayratia japonica	forest gap	6		8	Phytolacca americana	forest gap	29
8	Cayratia japonica	understory	12		8	Phytolacca americana	understory	4
9	Cayratia japonica	forest gap	18		9	Phytolacca americana	forest gap	18
9	Cayratia japonica	understory	9		9	Phytolacca americana	understory	5
10	Cayratia japonica	forest gap	4		10	Phytolacca americana	forest gap	6
10	Cayratia japonica	understory	12		10	Phytolacca americana	understory	7
11	Cayratia japonica	forest gap	2		11	Phytolacca americana	forest gap	10
11	Cayratia japonica	understory	1		11	Phytolacca americana	understory	6
12	Cayratia japonica	forest gap	0		12	Phytolacca americana	forest gap	20
12	Cayratia japonica	understory	8		12	Phytolacca americana	understory	7
13	Cayratia japonica	forest gap	5		13	Phytolacca americana	forest gap	17
13	Cayratia japonica	understory	0		13	Phytolacca americana	understory	6
14	Cayratia japonica	forest gap	1		14	Phytolacca americana	forest gap	7
14	Cayratia japonica	understory	1		14	Phytolacca americana	understory	6
15	Cayratia japonica	forest gap	1		15	Phytolacca americana	forest gap	23
15	Cayratia japonica	understory	1		15	Phytolacca americana	understory	3
