# Supplementary material for: Similar seed dispersal systems by local frugivorous birds in native and alien plant species in a coastal seawall forest
Source: PeerJ. 2021 Jun 22;9:e11672. doi: 10.7717/peerj.11672 (PMC8231312; doi:10.7717/peerj.11672)
Supplement: Supplemental Information 5 [file peerj-09-11672-s005.xlsx]

## Sheet: ripe-missing fruits percent
fruits plant	date	ripe fruits (%)	missing fruits(%)
Phytolacca americana	2018-09-01	1	0
Phytolacca americana	2018-09-01	1	0
Phytolacca americana	2018-09-01	5	0
Phytolacca americana	2018-09-01	5	0
Phytolacca americana	2018-09-01	3	0
Phytolacca americana	2018-09-05	5	5
Phytolacca americana	2018-09-05	5	7
Phytolacca americana	2018-09-05	8	5
Phytolacca americana	2018-09-05	8	5
Phytolacca americana	2018-09-05	5	5
Phytolacca americana	2018-09-10	10	10
Phytolacca americana	2018-09-10	15	12
Phytolacca americana	2018-09-10	10	15
Phytolacca americana	2018-09-10	12	12
Phytolacca americana	2018-09-10	10	10
Phytolacca americana	2018-09-15	10	10
Phytolacca americana	2018-09-15	18	15
Phytolacca americana	2018-09-15	15	18
Phytolacca americana	2018-09-15	20	20
Phytolacca americana	2018-09-15	12	10
Phytolacca americana	2018-09-20	30	25
Phytolacca americana	2018-09-20	25	20
Phytolacca americana	2018-09-20	40	40
Phytolacca americana	2018-09-20	25	25
Phytolacca americana	2018-09-20	30	30
Phytolacca americana	2018-09-25	33	40
Phytolacca americana	2018-09-25	30	22
Phytolacca americana	2018-09-25	40	42
Phytolacca americana	2018-09-25	35	27
Phytolacca americana	2018-09-25	35	32
Phytolacca americana	2018-09-30	45	42
Phytolacca americana	2018-09-30	40	35
Phytolacca americana	2018-09-30	45	45
Phytolacca americana	2018-09-30	38	30
Phytolacca americana	2018-09-30	45	41
Phytolacca americana	2018-10-05	48	44
Phytolacca americana	2018-10-05	55	39
Phytolacca americana	2018-10-05	54	49
Phytolacca americana	2018-10-05	45	42
Phytolacca americana	2018-10-05	49	43
Phytolacca americana	2018-10-15	65	55
Phytolacca americana	2018-10-15	70	60
Phytolacca americana	2018-10-15	62	57
Phytolacca americana	2018-10-15	55	45
Phytolacca americana	2018-10-15	60	55
Phytolacca americana	2018-10-20	89	65
Phytolacca americana	2018-10-20	82	62
Phytolacca americana	2018-10-20	80	69
Phytolacca americana	2018-10-20	73	59
Phytolacca americana	2018-10-20	75	70
Phytolacca americana	2018-10-25	94	80
Phytolacca americana	2018-10-25	90	78
Phytolacca americana	2018-10-25	85	72
Phytolacca americana	2018-10-25	88	75
Phytolacca americana	2018-10-25	90	80
Phytolacca americana	2018-10-30	95	90
Phytolacca americana	2018-10-30	92	85
Phytolacca americana	2018-10-30	90	80
Phytolacca americana	2018-10-30	98	90
Phytolacca americana	2018-10-30	95	82
Cayratia japonica	2018-09-01	3	0
Cayratia japonica	2018-09-01	5	0
Cayratia japonica	2018-09-01	5	0
Cayratia japonica	2018-09-01	5	0
Cayratia japonica	2018-09-01	3	0
Cayratia japonica	2018-09-05	7	5
Cayratia japonica	2018-09-05	10	12
Cayratia japonica	2018-09-05	10	20
Cayratia japonica	2018-09-05	10	25
Cayratia japonica	2018-09-05	10	24
Cayratia japonica	2018-09-10	10	5
Cayratia japonica	2018-09-10	18	15
Cayratia japonica	2018-09-10	18	22
Cayratia japonica	2018-09-10	20	27
Cayratia japonica	2018-09-10	30	28
Cayratia japonica	2018-09-15	12	10
Cayratia japonica	2018-09-15	26	16
Cayratia japonica	2018-09-15	30	25
Cayratia japonica	2018-09-15	30	25
Cayratia japonica	2018-09-15	33	30
Cayratia japonica	2018-09-20	20	15
Cayratia japonica	2018-09-20	35	20
Cayratia japonica	2018-09-20	40	30
Cayratia japonica	2018-09-20	38	32
Cayratia japonica	2018-09-20	40	35
Cayratia japonica	2018-09-25	30	17
Cayratia japonica	2018-09-25	38	22
Cayratia japonica	2018-09-25	55	37
Cayratia japonica	2018-09-25	45	40
Cayratia japonica	2018-09-25	55	40
Cayratia japonica	2018-09-30	35	22
Cayratia japonica	2018-09-30	45	40
Cayratia japonica	2018-09-30	60	40
Cayratia japonica	2018-09-30	50	42
Cayratia japonica	2018-09-30	58	48
Cayratia japonica	2018-10-05	40	40
Cayratia japonica	2018-10-05	48	42
Cayratia japonica	2018-10-05	68	43
Cayratia japonica	2018-10-05	65	45
Cayratia japonica	2018-10-05	68	50
Cayratia japonica	2018-10-15	48	42
Cayratia japonica	2018-10-15	60	50
Cayratia japonica	2018-10-15	75	55
Cayratia japonica	2018-10-15	73	55
Cayratia japonica	2018-10-15	75	54
Cayratia japonica	2018-10-20	70	80
Cayratia japonica	2018-10-20	62	50
Cayratia japonica	2018-10-20	70	70
Cayratia japonica	2018-10-20	80	65
Cayratia japonica	2018-10-20	85	66
Cayratia japonica	2018-10-25	75	82
Cayratia japonica	2018-10-25	75	55
Cayratia japonica	2018-10-25	80	74
Cayratia japonica	2018-10-25	88	70
Cayratia japonica	2018-10-25	89	70
Cayratia japonica	2018-10-30	90	85
Cayratia japonica	2018-10-30	80	57
Cayratia japonica	2018-10-30	95	75
Cayratia japonica	2018-10-30	96	73
Cayratia japonica	2018-10-30	96	75

## Sheet: sheet 2
年份	日期	取食频次
2017	44082	13
	44083	13
	44084	14
	44089	13
	44099	26
	44110	10
	44119	11
	44129	8
2018	44079	18
	44099	20
	44114	15
	44130	15
年份	日期	停留时间
2017	44082
	44083
	44084
	44089
	44099
	44110
	44119
	44129
2018	44079
	44099
	44114
	44130
